# Supplementary material for: Moderators of changes in smoking, drinking, and quitting behaviour associated with the first Covid-19 lockdown in England
Source: medRxiv preprint, doi:10.1101/2021.02.15.21251766, version 1 (2021-02-17)
Supplement: Supplementary File 3 [file 251766_file04.docx]

**Supplementary File 3**

Tests of moderation by age, sex, and social grade: interaction results

| **Table 1.** Tests of moderation by age, sex, and social grade: smoking outcomes | | | | | | | | | | | | | | |
| --- | --- | --- | --- | --- | --- | --- | --- | --- | --- | --- | --- | --- | --- | --- |
|  |  | **Age x month x year interaction** | | | | | | | | | | | | |
|  |  | 35-59 [ref 18-34] | | | | | |  | | ≥60 [ref 18-24] | | | | |
|  |  | **OR [95% CI]** | ***p*** |  | **ORadj [95% CI]** | ***p*** |  | | **OR [95% CI]** | | ***p*** |  | **ORadj [95% CI]** | ***p*** |
| Smoking prevalence1 | | 0.79 [0.61-1.02] | 0.066 |  | 0.79 [0.61-1.02] | 0.067 |  | | 0.60 [0.43-0.83] | | 0.002 |  | 0.60 [0.43-0.83] | 0.002 |
| Cessation2 | | 0.59 [0.20-1.77] | 0.345 |  | 0.59 [0.20-1.78] | 0.347 |  | | 0.54 [0.11-2.68] | | 0.451 |  | 0.52 [0.11-2.58] | 0.423 |
| Quit attempts2 | | 0.37 [0.23-0.60] | <0.001 |  | 0.37 [0.23-0.61] | <0.001 |  | | 0.39 [0.20-0.77] | | 0.007 |  | 0.38 [0.19-0.76] | 0.006 |
| Quit success3 | | 0.93 [0.28-3.09] | 0.909 |  | 0.96 [0.29-3.22] | 0.946 |  | | 1.08 [0.19-6.26] | | 0.932 |  | 0.89 [0.15-5.23] | 0.893 |
| Use of evidence-based support3a | | 0.48 [0.21-1.12] | 0.090 |  | 0.61 [0.26-1.47] | 0.274 |  | | 0.31 [0.09-1.04] | | 0.058 |  | 0.33 [0.09-1.16] | 0.083 |
| Use of remote support3b | | 0.04 [0.00-1.53] | 0.083 |  | 0.05 [0.00-1.95] | 0.108 |  | | -4c | | - |  | -4c | - |
|  |  | **Sex x month x year interaction** | | | | |  | | **Social grade x month x year interaction** | | | | | |
|  |  | Female [ref male] | | | | |  | | C2DE [ref ABC1] | | | | | |
|  |  | **OR [95% CI]** | ***p*** |  | **ORadj [95% CI]** | ***p*** |  | | **OR [95% CI]** | | ***p*** |  | **ORadj [95% CI]** | ***p*** |
| Smoking prevalence1 | | 0.90 [0.72-1.14] | 0.393 |  | 0.91 [0.72-1.14] | 0.395 |  | | 0.85 [0.67-1.07] | | 0.168 |  | 0.85 [0.67-1.07] | 0.171 |
| Cessation2 | | 1.52 [0.56-4.17] | 0.413 |  | 1.43 [0.52-3.94] | 0.490 |  | | 1.10 [0.40-3.01] | | 0.858 |  | 1.08 [0.39-2.96] | 0.888 |
| Quit attempts2 | | 1.00 [0.64-1.57] | 0.987 |  | 1.01 [0.64-1.58] | 0.969 |  | | 1.20 [0.76-1.88] | | 0.443 |  | 1.21 [0.76-1.91] | 0.422 |
| Quit success3 | | 2.04 [0.68-6.10] | 0.204 |  | 2.06 [0.68-6.26] | 0.203 |  | | 0.80 [0.27-2.41] | | 0.697 |  | 0.84 [0.28-2.54] | 0.756 |
| Use of evidence-based support3a | | 1.11 [0.51-2.39] | 0.798 |  | 1.39 [0.62-3.11] | 0.430 |  | | 0.71 [0.32-1.55] | | 0.385 |  | 0.85 [0.38-1.93] | 0.702 |
| Use of remote support3b | | 1.58 [0.10-25.15] | 0.747 |  | 1.64 [0.10-26.69] | 0.730 |  | | -4d | | - |  | -4d | - |
| Note: All data are weighted to match the adult population in England on age, social grade, region, tenure, ethnicity, and working status within sex.  CI, confidence interval. OR, odds ratio. ORadj, adjusted odds ratio. The ORadj for smoking prevalence adjusted for trend within year (i.e. August=1 through July=12) and trend across years (i.e. August 2018=1 through July 2020=24). ORadjs for other outcomes are additionally adjusted for age, sex, social grade, region (and, for analyses of cessation, quit success, and use of support, heaviness of smoking index).  1 Among all adults.  2 Among past-year smokers.  3 Among past-year smokers who made a quit attempt.  a Prescription medication, face-to-face behavioural support, nicotine replacement therapy obtained over the counter, e-cigarettes.  b Telephone support, websites, or apps. 4 Estimates could not be produced due to insufficient sample size: just 55 participants reported using remote support in a quit attempt (*n*=14 in the comparator year [*n*=5 Aug-Feb, *n*=9 Apr-Jul]; *n*=41 in the pandemic year [*n*=13 Aug-Feb, *n*=28 Apr-Jul]). c Of whom just 5 were aged ≥60 years (*n*=1 in the comparator year [*n*=0 Aug-Feb, *n*=1 Apr-Jul]; *n*=4 in the pandemic year [*n*=3 Aug-Feb, *n*=1 Apr-Jul]). d Of whom 16 were from social grades ABC1 (*n*=2 in the comparator year [*n*=0 Aug-Feb, *n*=2 Apr-Jul]; *n*=14 in the pandemic year [*n*=5 Aug-Feb, *n*=9 Apr-Jul]) and 40 were from C2DE (*n*=12 in the comparator year [*n*=5 Aug-Feb, *n*=7 Apr-Jul]; *n*=28 in the pandemic year [*n*=9 Aug-Feb, *n*=19 Apr-Jul]). | | | | | | | | | | | | | | |

| **Table 2.** Tests of moderation by age, sex, and social grade: drinking outcomes | | | | | | | | | | | | |
| --- | --- | --- | --- | --- | --- | --- | --- | --- | --- | --- | --- | --- |
|  |  | **Age x month x year interaction** | | | | | | | | | | |
|  |  | 35-59 [ref 18-34] | | | | |  | ≥60 [ref 18-24] | | | | |
|  |  | **OR [95% CI]** | ***p*** |  | **ORadj [95% CI]** | ***p*** |  | **OR [95% CI]** | ***p*** |  | **ORadj [95% CI]** | ***p*** |
| High-risk drinking prevalence1 | | 1.06 [0.85-1.33] | 0.590 |  | 1.06 [0.85-1.33] | 0.582 |  | 0.98 [0.76-1.27] | 0.880 |  | 0.98 [0.76-1.27] | 0.883 |
| Alcohol reduction attempts2 | | 0.56 [0.34-0.92] | 0.022 |  | 0.55 [0.33-0.91] | 0.020 |  | 1.00 [0.53-1.89] | 0.993 |  | 0.98 [0.51-1.86] | 0.942 |
| Use of evidence-based support3a | | 0.34 [0.02-6.21] | 0.469 |  | 0.58 [0.02-13.78] | 0.733 |  | -4c | - |  | -4c | - |
| Use of remote support3b | | 1.58 [0.16-15.82] | 0.697 |  | 1.50 [0.14-16.40] | 0.738 |  | 7.47 [0.23-244.27] | 0.258 |  | 5.06 [0.14-177.22] | 0.372 |
|  |  | **Sex x month x year interaction** | | | | |  | **Social grade x month x year interaction** | | | | |
|  |  | Female [ref male] | | | | |  | C2DE [ref ABC1] | | | | |
|  |  | **OR [95% CI]** | ***p*** |  | **ORadj [95% CI]** | ***p*** |  | **OR [95% CI]** | ***p*** |  | **ORadj [95% CI]** | ***p*** |
| High-risk drinking prevalence1 | | 1.32 [1.09-1.61] | 0.005 |  | 1.32 [1.09-1.61] | 0.005 |  | 1.48 [1.21-1.80] | <0.001 |  | 1.48 [1.21-1.80] | <0.001 |
| Alcohol reduction attempts2 | | 0.95 [0.60-1.48] | 0.806 |  | 0.98 [0.62-1.54] | 0.932 |  | 0.51 [0.31-0.82] | 0.006 |  | 0.54 [0.33-0.87] | 0.012 |
| Use of evidence-based support3a | | -4d | - |  | -4d | - |  | 0.75 [0.07-8.23] | 0.816 |  | 0.97 [0.07-13.47] | 0.984 |
| Use of remote support3b | | 10.17 [0.84-123.48] | 0.069 |  | 16.88 [1.30-218.96] | 0.031 |  | 0.07 [0.01-0.55] | 0.011 |  | 0.07 [0.01-0.62] | 0.017 |
| Note: All data are weighted to match the adult population in England on age, social grade, region, tenure, ethnicity, and working status within sex.  CI, confidence interval. ORadj, adjusted odds ratio. The ORadj for high-risk drinking prevalence is adjusted for trend within year (i.e. August=1 through July=12) and trend across years (i.e. August 2018=1 through July 2020=24). ORadjs for other outcomes are additionally adjusted for age, sex, social grade, region (and, for analyses of use of support, full AUDIT score as an indicator of dependence).  1 Among all adults.  2 Among high-risk drinkers.  3 Among high-risk drinkers who made a reduction attempt.  a Prescription medication or face-to-face behavioural support.  b Telephone support, websites, or apps. 4 Estimates could not be produced due to insufficient sample size: just 54 participants reported using evidence-based support in an alcohol reduction attempt (*n*=34 in the comparator year [*n*=19 Aug-Feb, *n*=15 Apr-Jul]; *n*=20 in the pandemic year [*n*=13 Aug-Feb, *n*=7 Apr-Jul]). c Of whom just 4 were aged ≥60 years (*n*=4 in the comparator year [*n*=3 Aug-Feb, *n*=1 Apr-Jul]; *n*=4 in the pandemic year [*n*=4 Aug-Feb, *n*=0 Apr-Jul]). d Of whom 23 were male (*n*=20 in the comparator year [*n*=14 Aug-Feb, *n*=6 Apr-Jul]; *n*=3 in the pandemic year [*n*=3 Aug-Feb, *n*=0 Apr-Jul]) and 31 were female (*n*=14 in the comparator year [*n*=5 Aug-Feb, *n*=9 Apr-Jul]; *n*=17 in the pandemic year [*n*=10 Aug-Feb, *n*=7 Apr-Jul]). | | | | | | | | | | | | |
